# Supplementary material for: Genome-Wide Identification and Expression Pattern Analysis of Dirigent Members in the Genus Oryza
Source: MDPI journal article supplement (doi:10.3390/ijms24087189), 2023-04-13
Supplement: s1 [file s1]

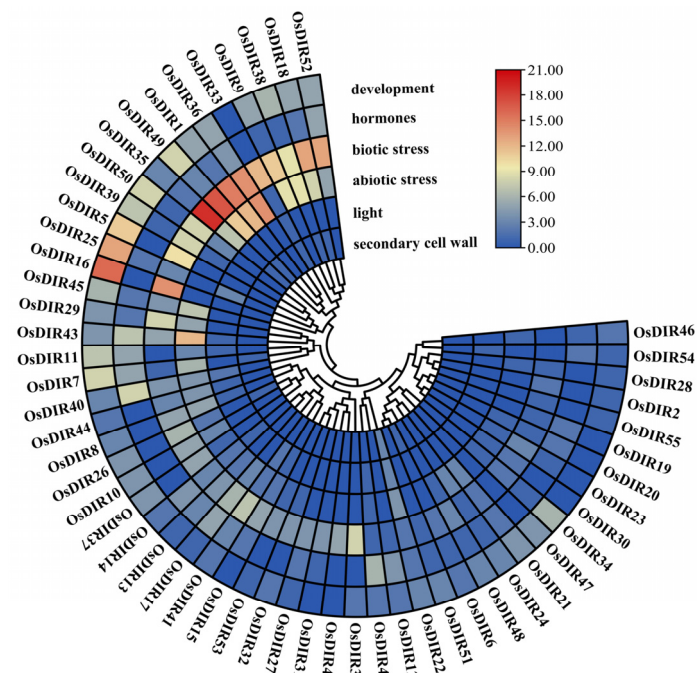

**Supplemental Figure S1.** Identification of transcription factor binding sites (TFBS) in the promoter regions of *OsjDIR* genes. A total 86 JASPAR matrices were selected. P-value  $\leq 1E^{-7}$ . Heat map represent the number of TFBS in each variety. Including secondary cell wall, light, abiotic stress, biotic stress, hormones and development. The heatmap was constructed by Tbtools software.

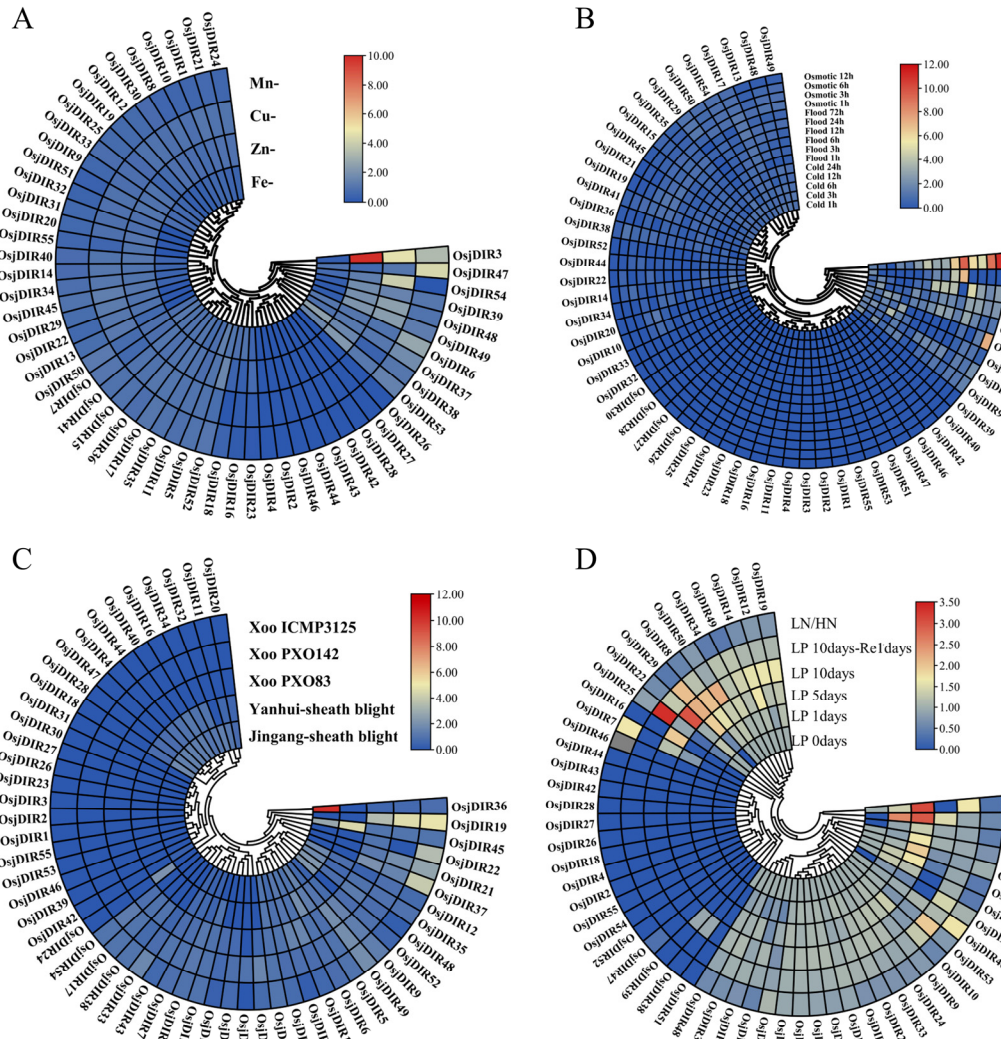

**Supplemental Figure S2.** Expression profiles of the *OsjDIR* genes in response to the biotic and abiotic stresses based on the RNA-seq data. (A) The heat map exhibited the relative expression levels of *OsjDIR* genes in response to nutrient elements deficiency (Mn-, Cu-, Zn-, Fe-) treatments. (B) The heat map exhibited the relative expression of *OsjDIR* genes in response to osmotic, flood and cold stress. (C) The heat map exhibited the expression of *OsjDIR* genes in response to Xoo and sheath blight infection. (D) The heat map exhibited the expression levels of *OsjDIR* genes under low nitrogen (LN) and low phosphate (LP) treatments. The heatmap was constructed by Tbtools software.

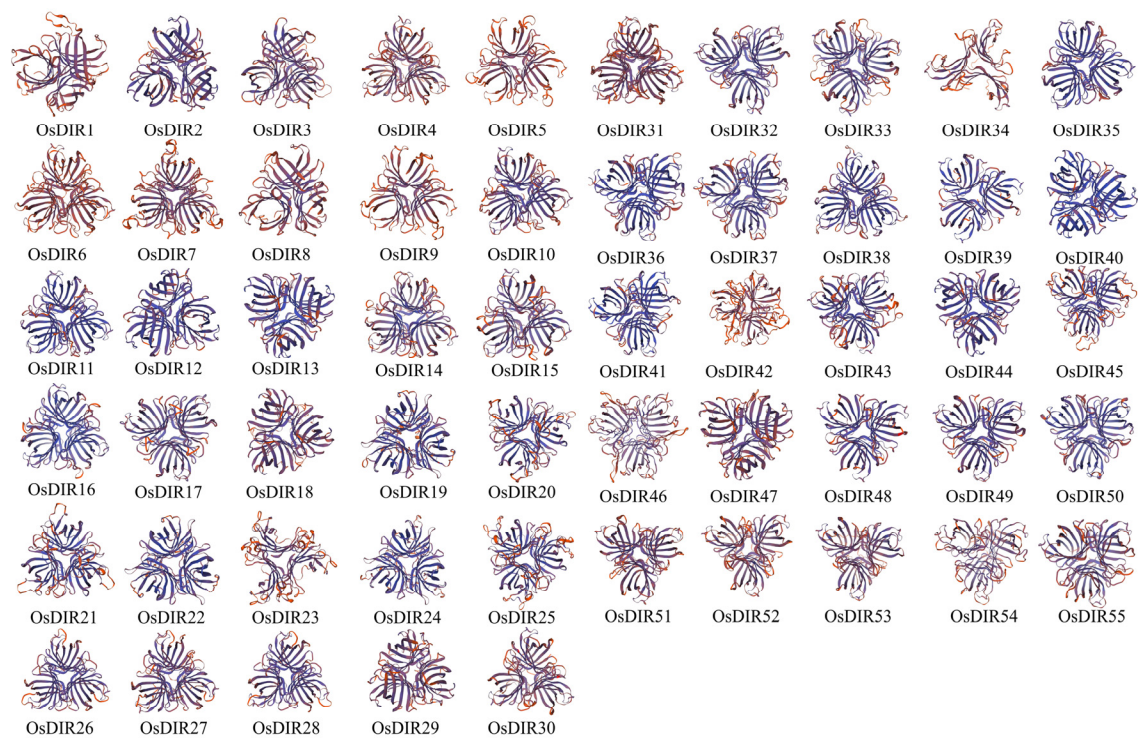

**Supplemental Figure S3.** Predicted tertiary structures of rice OsjDIR proteins. The tertiary structures of DIR protein from *Oryza sativa* ssp. *Japonica* were predicted by the SWISS website (<https://swissmodel.expasy.org/interactive>, accessed on 5 April 2022).

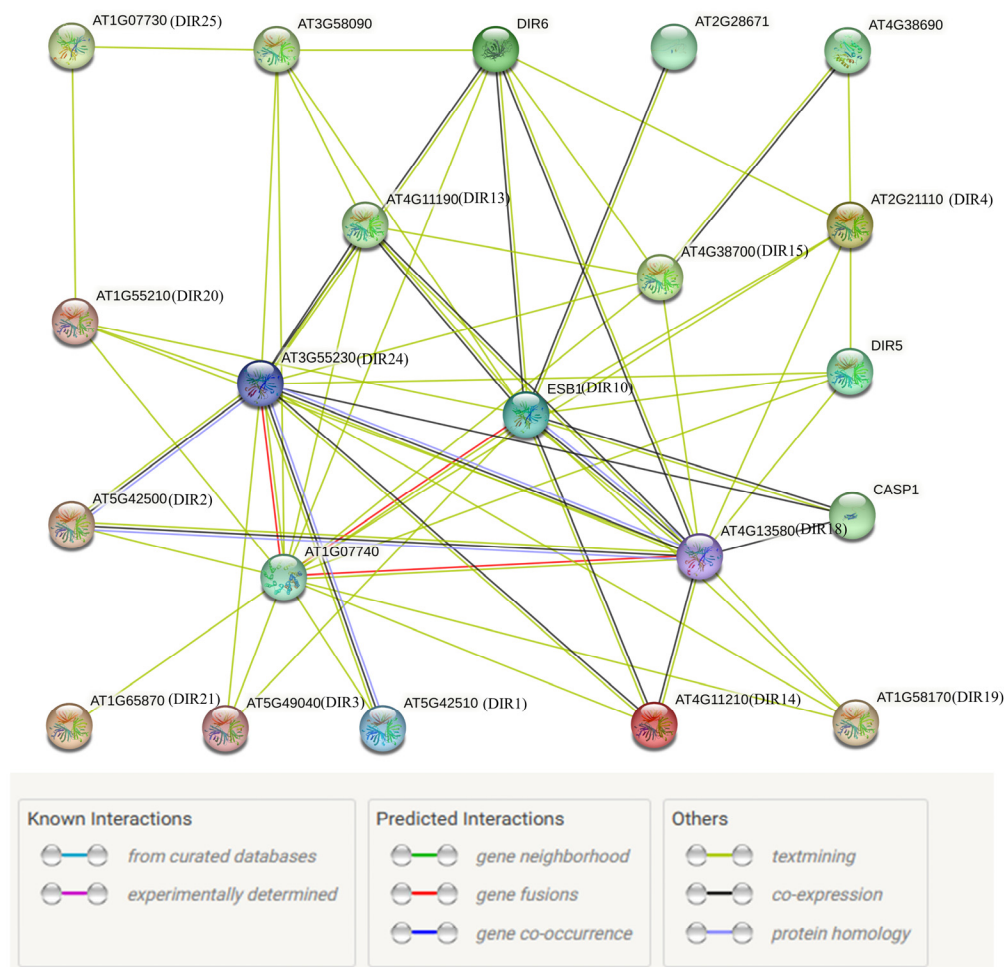

**Supplemental Figure S4.** Predicted interaction networks of dirigent proteins in Arabidopsis. A protein–protein interaction network among dirigent proteins in Arabidopsis was predicted using STRING (<https://cn.string-db.org/>, accessed on 20 April 2022).
